# Supplementary material for: Cannabidiol Content and In Vitro Biological Activities of Commercial Cannabidiol Oils and Hemp Seed Oils
Source: PubMed Central journal article supplement (PMC7555937; doi:10.3390/medicines7090057), 2020-09-07
Supplement: medicines-07-00057-s001.pdf [file medicines-07-00057-s001.pdf]

# Supplementary Materials: Cannabidiol Content and In Vitro Biological Activities of Commercial Cannabidiol Oils and Hemp Seed Oils

Masashi Kitamura, Yuka Kiba, Ryuichiro Suzuki, Natsumi Tomida, Akemi Uwaya, Fumiyuki Isami and Shixin Deng

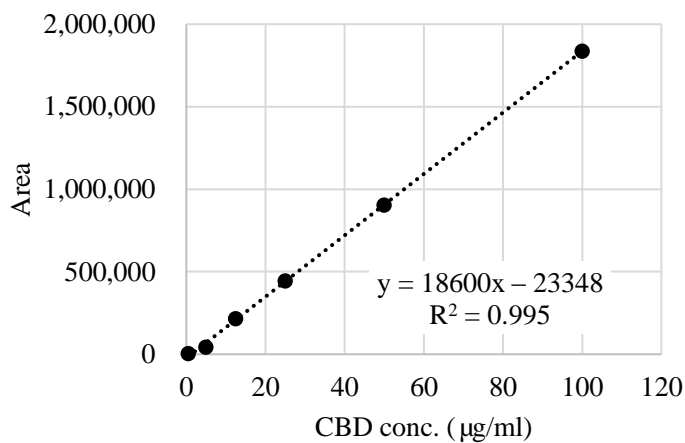

(a)

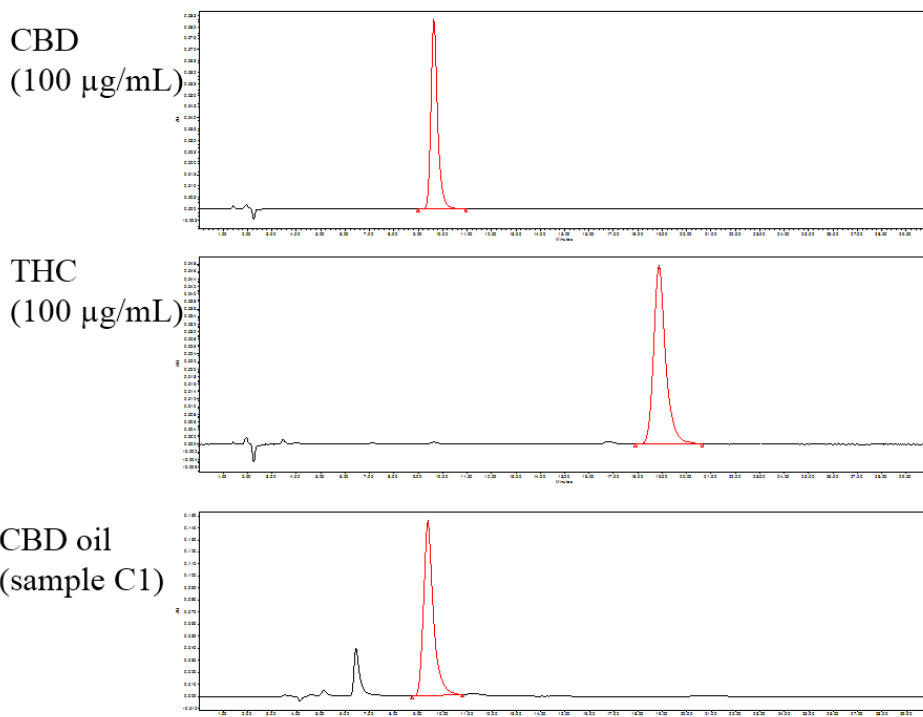

(b)

**Figure S1.** (a) Linearity plot of CBD standard. (b) HPLC chromatographs of CBD standard, THC standard, and CBD oil sample (C1). CBD and THC reference standards were obtained from Cayman Chemical, Michigan, USA and Sigma-Aldrich, USA, respectively. The CBD concentrations in the CBD and hemp oil samples are shown in Figure 1. THC was not detected in any samples.
